# Supplementary material for: Candida parapsilosis Cell Wall Proteome Characterization and Effectiveness against Hematogenously Disseminated Candidiasis in a Murine Model
Source: MDPI journal article supplement (doi:10.3390/vaccines11030674), 2023-03-16
Supplement: s1 [file s1]

## Supplementary File S1: Result of VITEK 2 analysis for the colonies after CFU plate counting

bioMérieux Customer: CMJAH  
 System #: 3809  
 Isolate: XG-1 (Approved)  
 Card Type: YST Bar Code: 2432153503725447 Testing Instrument: 0000151-2342D (CMJAH)  
 Setup Technologist: thuhle Sibiyi(thuhle)

### Laboratory Report

Printed by: Labadmin  
 Bench: mycology

Bionumber: 4112144645111731

Organism Quantity:

Selected Organism: *Candida parapsilosis*

|           |  |
|-----------|--|
| Comments: |  |
|           |  |
|           |  |
|           |  |

|                                                                                                                         |                                                                                                               |                            |                                   |
|-------------------------------------------------------------------------------------------------------------------------|---------------------------------------------------------------------------------------------------------------|----------------------------|-----------------------------------|
| Identification Information                                                                                              | Card: YST                                                                                                     | Lot Number: 2432153503     | Expires: Oct 19, 2023 15:00 CDT   |
|                                                                                                                         | Status: Final                                                                                                 | Analysis Time: 18:02 hours | Completed: Oct 29, 2022 10:41 CDT |
| Organism Origin                                                                                                         | VITEK 2                                                                                                       |                            |                                   |
| Selected Organism                                                                                                       | 90% Probability <i>Candida parapsilosis</i><br>Bionumber: 4112144645111731<br>Confidence: Good identification |                            |                                   |
| Analysis Organisms and Tests to Separate:                                                                               |                                                                                                               |                            |                                   |
| Analysis Messages:<br>See product information for additional information.                                               |                                                                                                               |                            |                                   |
| Contraindicating Typical Biopattern(s)<br><i>Candida parapsilosis</i> dXYLa(85),NAGa(78),MAdGa(99),dGATa(88),GLYLa(88). |                                                                                                               |                            |                                   |

| Biochemical Details |       |   |    |        |     |    |        |   |    |       |     |
|---------------------|-------|---|----|--------|-----|----|--------|---|----|-------|-----|
| 3                   | LysA  | - | 4  | IMI-Ta | -   | 5  | LeuA   | + | 7  | ARG   | +   |
| 13                  | TyrA  | - | 14 | BNAG   | -   | 15 | ARBa   | - | 18 | AMYa  | -   |
| 21                  | dGluA | + | 23 | LACa   | -   | 24 | NEAdCa | - | 26 | dCELa | -   |
| 29                  | dRAFa | - | 30 | NAGA1  | -   | 32 | dMNEa  | + | 33 | dMFLa | -   |
| 39                  | IRHFa | - | 40 | XL-Ta  | -   | 42 | dSORa  | + | 44 | SACa  | -   |
| 47                  | dFLRa | + | 48 | dTRFa  | +   | 49 | NO3a   | - | 51 | IARAn | (+) |
| 54                  | RGLTa | + | 55 | dXYLa  | +   | 56 | LATa   | - | 58 | ACEa  | -   |
| 61                  | IPROa | - | 62 | 2KCJa  | -   | 63 | NAGa   | - | 64 | dGNTa | +   |
| 10                  | TRYa  | - | 12 | GLYLa  | -   | 19 | dGALa  | + | 20 | GENa  | -   |
| 27                  | GGT   | - | 28 | dMALa  | +   | 34 | dMLZa  | + | 38 | ISBFa | (+) |
| 45                  | URE   | - | 46 | AGLU   | +   | 52 | dGATa  | - | 53 | ISC   | -   |
| 59                  | CTTa  | + | 60 | GRTas  | (+) |    |        |   |    |       |     |

Installed VITEK 2 Systems Version: 9.02  
 MIC Interpretation Guideline:  
 AES Parameter Set Name:

Therapeutic Interpretation Guideline:  
 AES Parameter Last Modified:

bioMérieux Customer:

System #: 3809

Isolate: SGS-1 (Approved)

Card Type: YST Bar Code: 2432069503657210 Testing Instrument: 000015F2342D (CMJAH)

Setup Technologist: thulile Sibaya(thulile)

CMJAH  
Laboratory Report

Printed by: Labadinn

Bench: mycology

Bionumber: 4112544645311771

Organism Quantity:

Selected Organism: *Candida parapsilosis*

| Action | Name (User ID) | Date/Time | Comment |
|--------|----------------|-----------|---------|
|--------|----------------|-----------|---------|

Installed VITEK 2 Systems Version: 9.02

MIC Interpretation Guideline:

ALS Parameter Set Name:

Therapeutic Interpretation Guideline:

ALS Parameter Last Modified:

Page 2 of 2
